# Supplementary material for: High-resolution modelling of the seasonal evolution of surface water storage on the Greenland Ice Sheet
Source: Copernicus journal article supplement (doi:10.5194/tc-8-1149-2014), 2014-07-04
Supplement: Supplementary file 1 [file tc-8-1149-2014-supplement.zip]

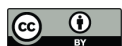

## *Supplement of*

# **High-resolution modelling of the seasonal evolution of surface water storage on the Greenland Ice Sheet**

**N. S. Arnold et al.**

*Correspondence to:* N. S. Arnold (nsa12@cam.ac.uk)

- Supplement-Cover-Letter.pdf
- Animations
  - S1a\_2500.mp4
  - S1b\_5000.mp4
  - S1c\_7500.mp4
- \_\_MACOSX
  - Animations
    - \* .\_S1a\_2500.mp4
    - \* .\_S1b\_5000.mp4
